# Supplementary material for: Pentafluorophenyl substituted fulleropyrrolidine: a molecule enabling the most efficient flexible electrochromic device with fast switching
Source: Royal Society of Chemistry journal article supplement (doi:10.1039/d0tc04991c), 2021-01-01
Supplement: d0tc04991c1.pdf [file d0tc04991c1.pdf]

**Supporting Information**

**Pentafluorophenyl Substituted Fulleropyrrolidine: A molecule enabling the  
most efficient flexible electrochromic device with fast switching**

Anjali Chaudhary<sup>§,1</sup>, Gangala Sivakumar<sup>§,2</sup>, Devesh K. Pathak<sup>1</sup>, Manushree Tanwar<sup>1</sup>, Rajneesh  
Misra<sup>2,\*</sup> and Rajesh Kumar<sup>1,3,\*</sup>

<sup>1</sup>*Materials and Device Laboratory, Department of Physics, Indian Institute of Technology  
Indore, Simrol-453552, India.*

<sup>2</sup>*Department of Chemistry, Indian Institute of Technology Indore, Simrol-453552, India.*

<sup>3</sup>*Centre for Advanced Electronics, Indian Institute of Technology Indore, Simrol-453552, India.*

<sup>§</sup>*Authors having equal contribution.*

\* e-mail: [rajeshkumar@iiti.ac.in](mailto:rajeshkumar@iiti.ac.in) (Rajesh Kumar); [rajneeshmisra@iiti.ac.in](mailto:rajneeshmisra@iiti.ac.in) (Rajneesh Misra)

## Device Fabrication recipe

1. Firstly, ITO coated substrates were cleaned with ultra-sonication in acetone, ethanol and distilled water successively for 10 minutes prior to device fabrication. Then solutions of 0.3 wt% P3HT and 0.2 wt% pentafluorophenyl substituted fulleropyrrolidine in 1, 2- Dichlorobenzene were prepared and stirred using vortex.
2. Thereafter, 50  $\mu$ L of pentafluorophenyl substituted fulleropyrrolidine solution was spin coated on ITO substrate at 600 rpm for 120 seconds. After few minutes, spin coat P3HT solution on above substrate at 600 rpm for 120 seconds and let the substrate dry to get P3HT film of  $\sim 1$   $\mu$ m.
3. A 5wt% PEO is dissolved in ACN and a mixture of 1M LiClO<sub>4</sub> in ACN has been prepared. To make a gel electrolyte, PEO gel was mixed with solution of LiClO<sub>4</sub> in 2:1 ratio.
4. Then take a second substrate patterned with tape and add LiClO<sub>4</sub> embedded in PEO matrix as an electrolyte in between substrates, stick them together such that their conducting surfaces face each other to fabricate device.
5. The same procedure is used for making flexible device on ITO coated PET substrates.

### Synthesis procedure of pentafluorophenyl substituted fulleropyrrolidine.

The pentafluorophenyl substituted fulleropyrrolidine was synthesized by following reported procedure<sup>1</sup>. A mixture of C<sub>60</sub> (200 mg, 0.28 mmol), 2,3,4,5,6-pentafluorobenzaldehyde (26 mg, 0.14 mmol), and N-methylglycine (36 mg, 0.41 mmol) in 25 mL of dry toluene was refluxed for 16 h. After evaporation of the solvent, the crude compound was purified over a silica column. The desired compound was eluted by hexane:dichloromethane (90:10 v/v). Yield = 35%. <sup>1</sup>H

NMR (300 MHz, CDCl<sub>3</sub>)  $\delta$  5.47 (s, 1H), 5.03 (d, J = 9.5 Hz, 1H), 4.21 (dd, J = 9.5, 3.0 Hz, 1H), 2.86 (s, 3H). HRMS (m/z): [M+H]<sup>+</sup> calcd for C<sub>69</sub>H<sub>6</sub>F<sub>5</sub>N, 944.049, found 944.045.

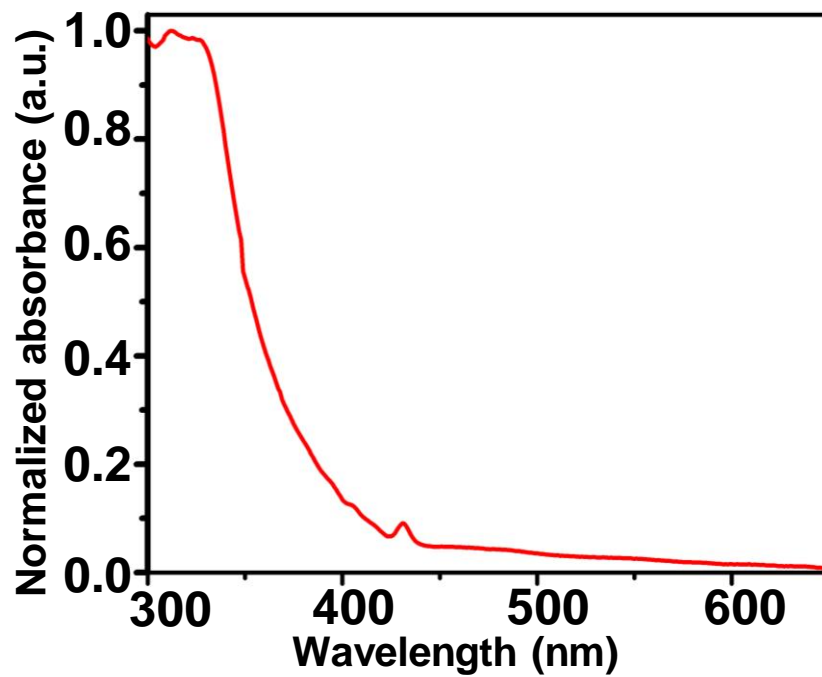

Figure S1: UV-Vis absorbance spectrum of pentafluorophenyl substituted fulleropyrrolidine.

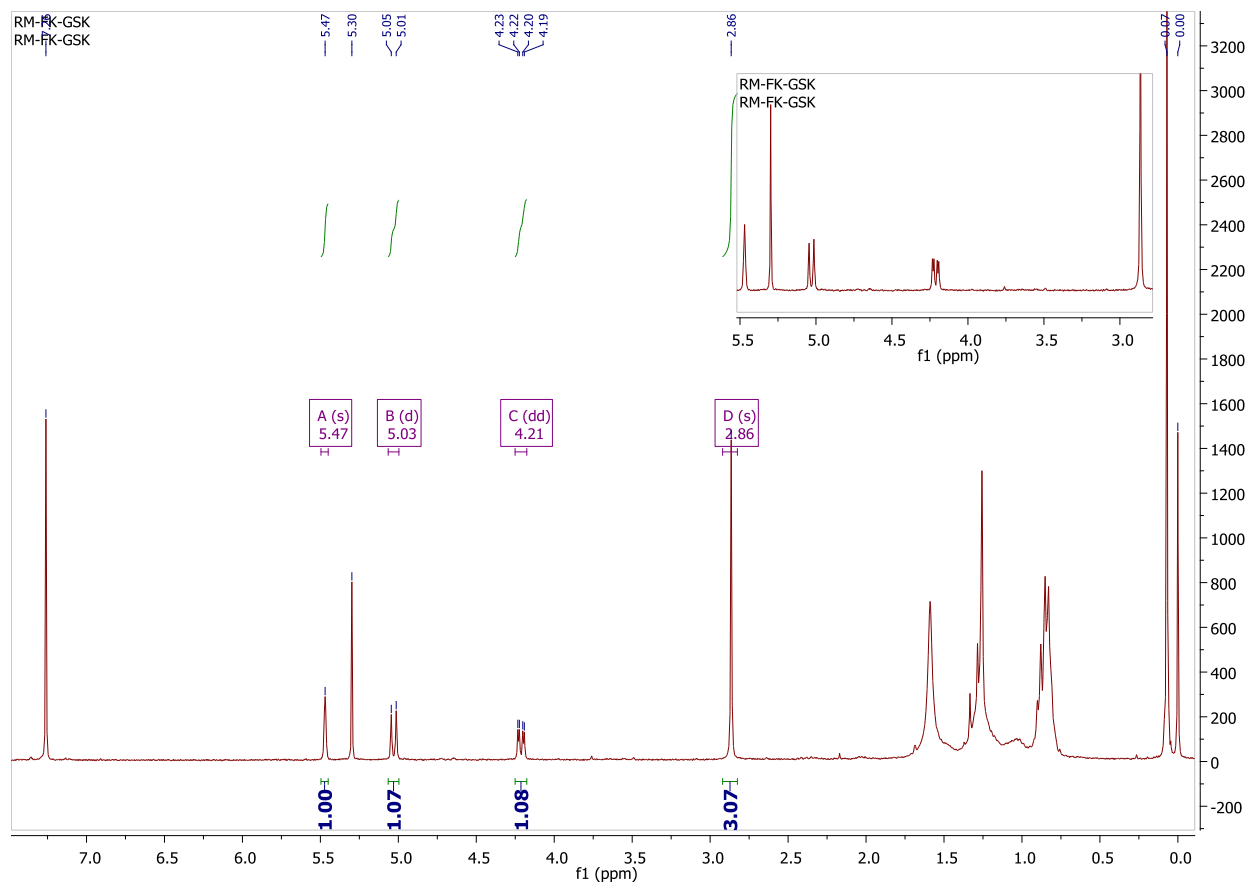

Figure S2:  $^1\text{H-NMR}$  of compound pentafluorophenyl substituted fulleropyrrolidine.

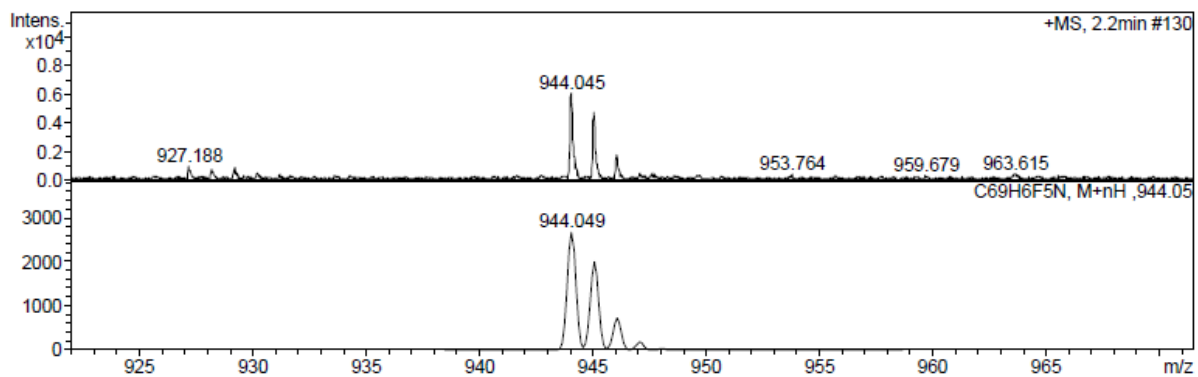

Figure S3: HRMS of compound pentafluorophenyl substituted fulleropyrrolidine.

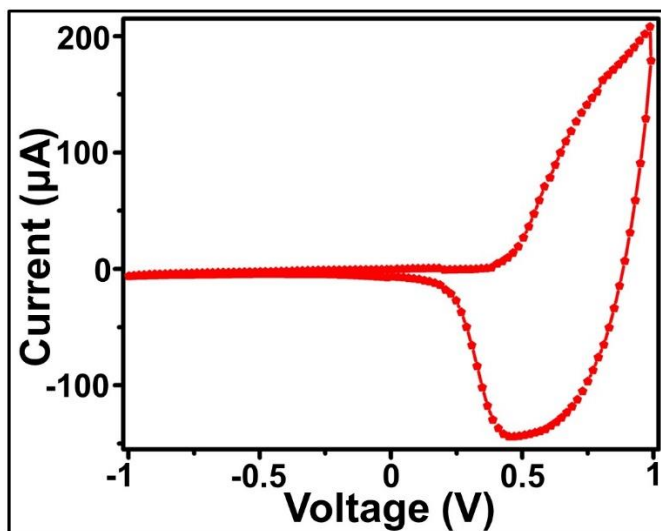

Figure S4: Cyclic Voltammogram of P3HT in PSF solvent.

To establish the fact that PSF helps in facilitating electron transfer in combined PSF-P3HT device. Cyclic Voltammogram of P3HT electrode in PSF solution has been carried out as shown in Figure S4. From 0 to -1V, it shows zero current since PSF holds electron in this situation, an effect similar to the one reported earlier with different molecule<sup>2</sup>.

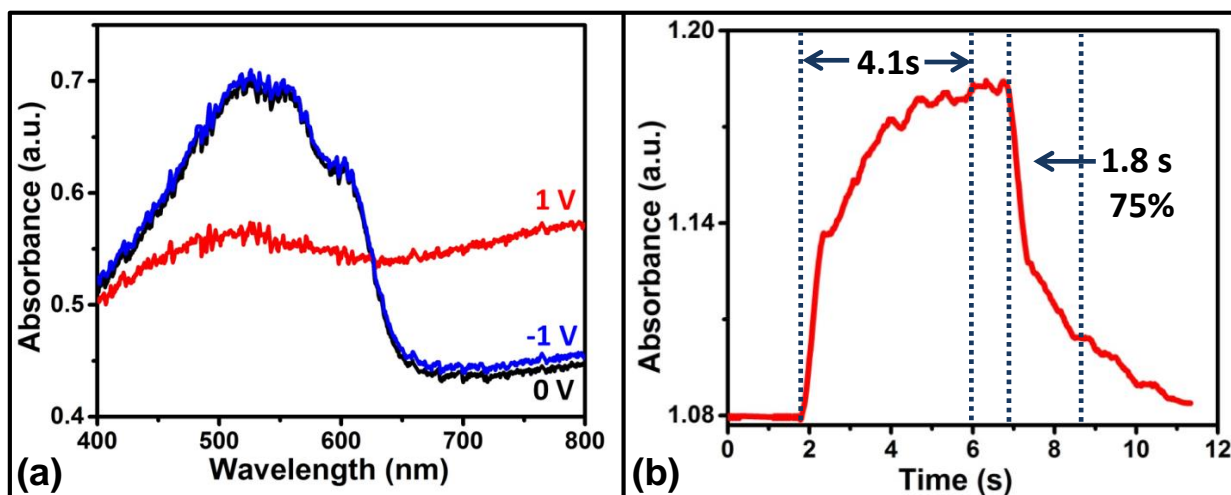

Figure S5: (a) In-situ bias dependent absorbance spectra of P3HT device and (b) one absorbance cycle to demonstrate switching time.

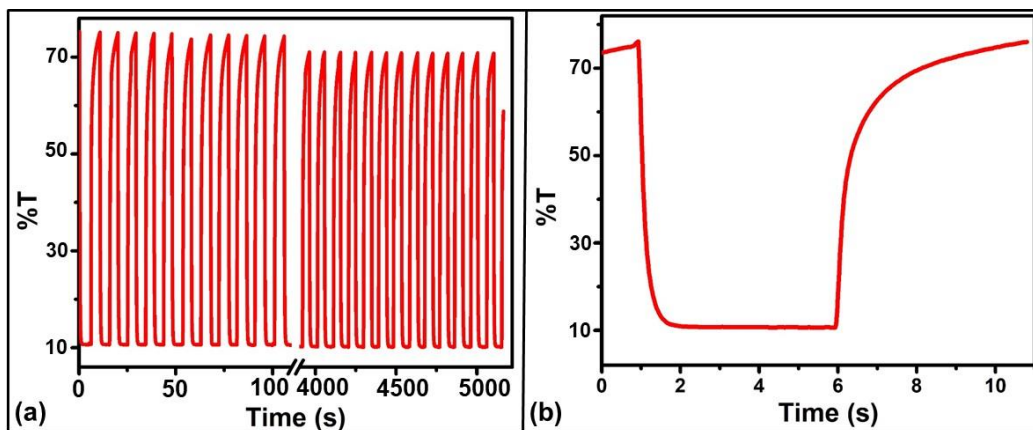

Figure S6: (a) %Transmission of colouration/bleaching cycles of device for 5100 s and (b) one % Transmission cycle displaying switching time of the device.

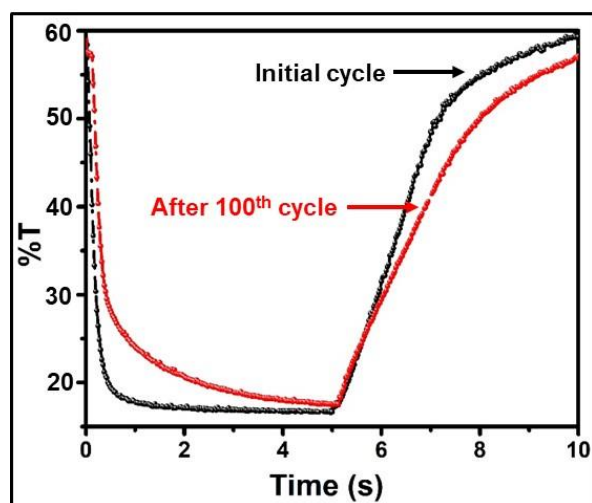

Figure S7: Switching response of flexible device in first cycle and after 100 bending cycles.

Table S1: Comparison of different electrochromic performance parameters of P3HT containing devices.

| S.no. | Device composition                                              | Switching time (s) | Coloration Efficiency (cm <sup>2</sup> /C) | Stability (s) | References                   |
|-------|-----------------------------------------------------------------|--------------------|--------------------------------------------|---------------|------------------------------|
| 1.    | P3HT/<br>pentafluorophenyl<br>substituted<br>fulleropyrrolidine | 0.3                | 443                                        | 5000          | This work                    |
| 2.    | P3HT/WO <sub>3</sub>                                            | 1.3/5.1            | Not reported                               | Not reported  | Kim et al <sup>3</sup>       |
| 3.    | P3HT                                                            | 1.4/1.2            | Not reported                               | 1800          | Chou et al <sup>4</sup>      |
| 4.    | P3HT                                                            | 1.01/1.88          | Not reported                               | 2000          | Jiemsakul et al <sup>5</sup> |
| 5.    | P3HT                                                            | 2.5/2.5            | 230                                        | Not reported  | Li et al <sup>6</sup>        |
| 6.    | P3HT/EV                                                         | 2/4                | 222                                        | 500           | Chaudhary et al <sup>7</sup> |

Table S2: Comparison of switching speed of different flexible devices.

| S.No. | Device composition                                                                               | Switching time (s) | References                  |
|-------|--------------------------------------------------------------------------------------------------|--------------------|-----------------------------|
| 1.    | SiO <sub>2</sub> /PANI                                                                           | 15/12.3            | Zhang et al <sup>8</sup>    |
| 2.    | Monoheptyl viologen & diheltyl viologen                                                          | 17/32              | Oh et al <sup>9</sup>       |
| 3.    | WO <sub>3</sub>                                                                                  | 5                  | Cossari et al <sup>10</sup> |
| 4.    | WO <sub>3</sub> .2H <sub>2</sub> O                                                               | 13.4/12.5          | Liang et al <sup>11</sup>   |
| 5.    | poly( $\epsilon$ -caprolactone) (PCL)<br>electrospun mats filled with silica (SiO <sub>2</sub> ) | 25.2/16.2          | Liu et al <sup>12</sup>     |

## References:

- (1) Babu, S. S.; Saeki, A.; Seki, S.; Möhwald, H.; Nakanishi, T. Millimeter-Sized Flat Crystalline Sheet Architectures of Fullerene Assemblies with Anisotropic Photoconductivity. *Phys. Chem. Chem. Phys.* **2011**, *13* (11), 4830–4834. <https://doi.org/10.1039/C0CP02265A>.
- (2) Mishra, S.; Yogi, P.; Saxena, S. K.; Roy, S.; Sagdeo, P. R.; Kumar, R. Fast Electrochromic Display: Tetrathiafulvalene–Graphene Nanoflake as Facilitating Materials. *J. Mater. Chem. C* **2017**, *5* (36), 9504–9512. <https://doi.org/10.1039/C7TC02913F>.
- (3) Kim, T.-H.; Jeon, H. J.; Lee, J.-W.; Nah, Y.-C. Enhanced Electrochromic Properties of Hybrid P3HT/WO<sub>3</sub> Composites with Multiple Colorations. *Electrochemistry Communications* **2015**, *57*, 65–69. <https://doi.org/10.1016/j.elecom.2015.05.008>.
- (4) Chou, H.-H.; Nguyen, A.; Chortos, A.; To, J. W. F.; Lu, C.; Mei, J.; Kurosawa, T.; Bae, W.-G.; Tok, J. B.-H.; Bao, Z. A Chameleon-Inspired Stretchable Electronic Skin with Interactive Colour Changing Controlled by Tactile Sensing. *Nature Communications* **2015**, *6*, 8011. <https://doi.org/10.1038/ncomms9011>.
- (5) Jiemsakul, T.; Jiramitmongkon, K.; Asawapirom, U.; Chotsuwan, C. Investigation of P3HT Electrochromic Polymer Films Prepared by Ultrasonication of Polymer Solutions. *J Mater Sci* **2017**, *52* (14), 8485–8492. <https://doi.org/10.1007/s10853-017-1109-3>.
- (6) Li, X.-Y.; Pang, Y.-H.; Shi, G.-Y.; Jun-Ru, J.-R. Z.; Wang, F.; Jin, L.-T. Synthesis and Electrochromic Properties of Poly(3-Hexyl-Thio- Phene) in a Room Temperature Ionic Liquid and Its Application to an Electrochromic Device. *Chinese Journal of Chemistry* **26** (4), 677–680. <https://doi.org/10.1002/cjoc.200890128>.
- (7) Chaudhary, A.; Pathak, D. K.; Mishra, S.; Yogi, P.; Sagdeo, P. R.; Kumar, R. Polythiophene - Viologen Bilayer for Electro-Trichromic Device. *Solar Energy Materials and Solar Cells* **2018**, *188*, 249–254. <https://doi.org/10.1016/j.solmat.2018.08.029>.
- (8) Patterned Flexible Electrochromic Device Based on Monodisperse Silica/Polyaniline Core/Shell Nanospheres <http://jes.ecsdl.org/content/166/8/H343> (accessed Sep 15, 2019).
- (9) Voltage-Tunable Multicolor, Sub-1.5 V, Flexible Electrochromic Devices Based on Ion Gels | ACS Applied Materials & Interfaces <https://pubs.acs.org/doi/10.1021/acsami.7b00624> (accessed Sep 15, 2019).
- (10) Room temperature processing for solid-state electrochromic devices on single substrate: From glass to flexible plastic - ScienceDirect <https://www.sciencedirect.com/science/article/pii/S0927024816302045?via%3Dihub> (accessed Sep 15, 2019).
- (11) Liang, L.; Zhang, J.; Zhou, Y.; Xie, J.; Zhang, X.; Guan, M.; Pan, B.; Xie, Y. High-Performance Flexible Electrochromic Device Based on Facile Semiconductor-to-Metal Transition Realized by WO<sub>3</sub>·2H<sub>2</sub>O Ultrathin Nanosheets. *Scientific Reports* **2013**, *3*, 1936. <https://doi.org/10.1038/srep01936>.
- (12) Poly-ε-caprolactone nanofibrous mats as electrolyte host for tailorable flexible electrochromic devices - ScienceDirect <https://www.sciencedirect.com/science/article/pii/S0921510719300273?via%3Dihub> (accessed Sep 15, 2019).
